# Supplementary material for: Improved mechanical, optical, and electrical properties of chitosan films with the synergistic reinforcing effect of carbon nanotubes and reduced graphene oxide for potential optoelectronic applications
Source: Research Square preprint supplement (doi:10.21203/rs.3.rs-2725043/v1), 2023-04-03
Supplement: Supplementary file 1 [file 1e9f0ac4959dc341f5c1f9b8.doc]

**Supporting Information**

**Improved mechanical, optical, and electrical properties of chitosan films with the synergistic reinforcing effect of carbon nanotubes and reduced graphene oxide for potential optoelectronic applications**

Jesús Roldán González-Martínez1, Aurora Guadalupe Magallanes-Vallejo2, Ana Bertha López-Oyama 3,4*, Tomás Jesús Madera-Santana5, Karely Anaya-Garza3*, Eugenio Rodríguez-González2, Felipe Barfusson-Domínguez6, Rogelio Gámez-Corrales6

*1DIFUS. Universidad de Sonora, Rosales y Transversal 83000 Hermosillo, Sonora, México*

*2 Cicata-IPN. Km 14.5 Carr. Puerto Industrial. 89600. Altamira, Tamaulipas, México*

*3DIQM. Universidad de Sonora, Rosales y Transversal 83000 Hermosillo, Sonora, México*

*4 Conacyt-Cicata Km. 14.5 Carretera Puerto Industrial. 89600. Altamira, Tamaulipas, México*

*5CIAD, A.C., Carr. Gustavo E. Astiazarán Rosas No. 46, Col. La Victoria, C.P. 83304, Hermosillo, Sonora, México.*

*6Departamento de Física, Universidad de Sonora, Rosales y Transversal, 83000 Hermosillo, Sonora, México*

*Corresponding author: [ablopezoy@conacyt.mx](mailto:ablopezoy@conacyt.mx) (López-Oyama, Ana Bertha) and [karely.anaya@unison.mx](mailto:karely.anaya@unison.mx) (Anaya-Garza, Karely)

1. **Supporting Figures and Tables**
   1. **Figures**

|  |  | CNT | rGO | CNT/rGO |
| --- | --- | --- | --- | --- |
| CSL | 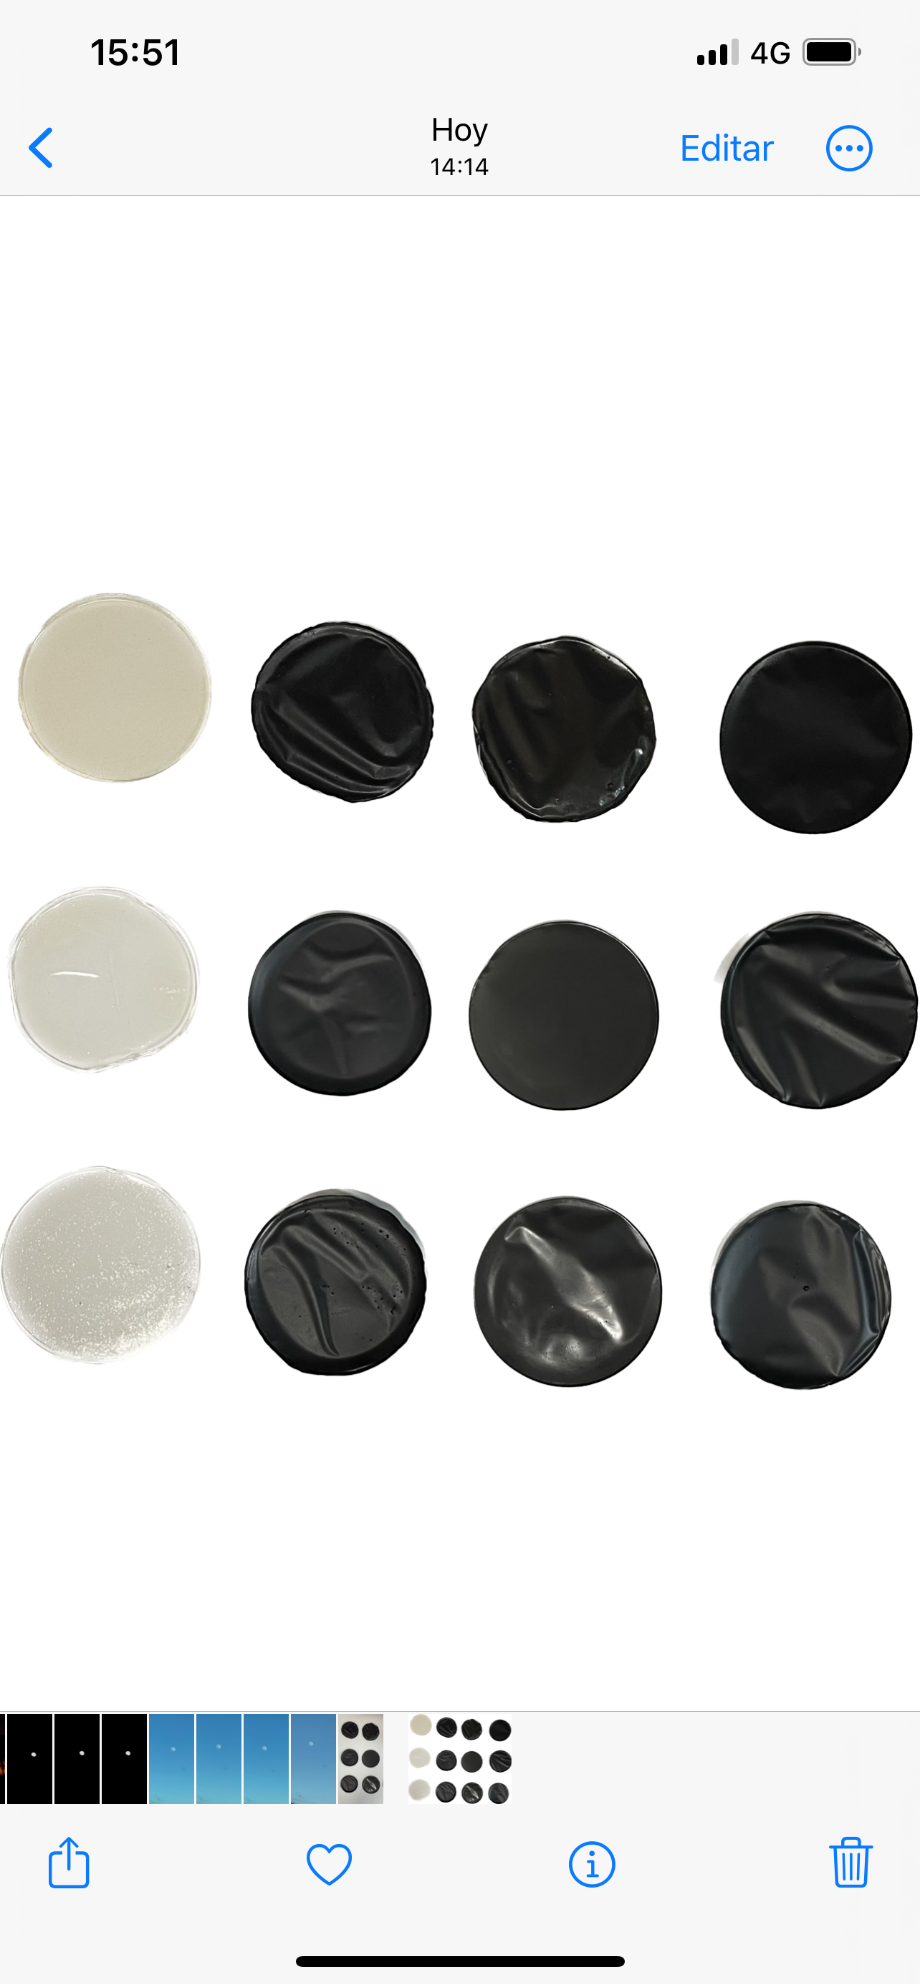 | 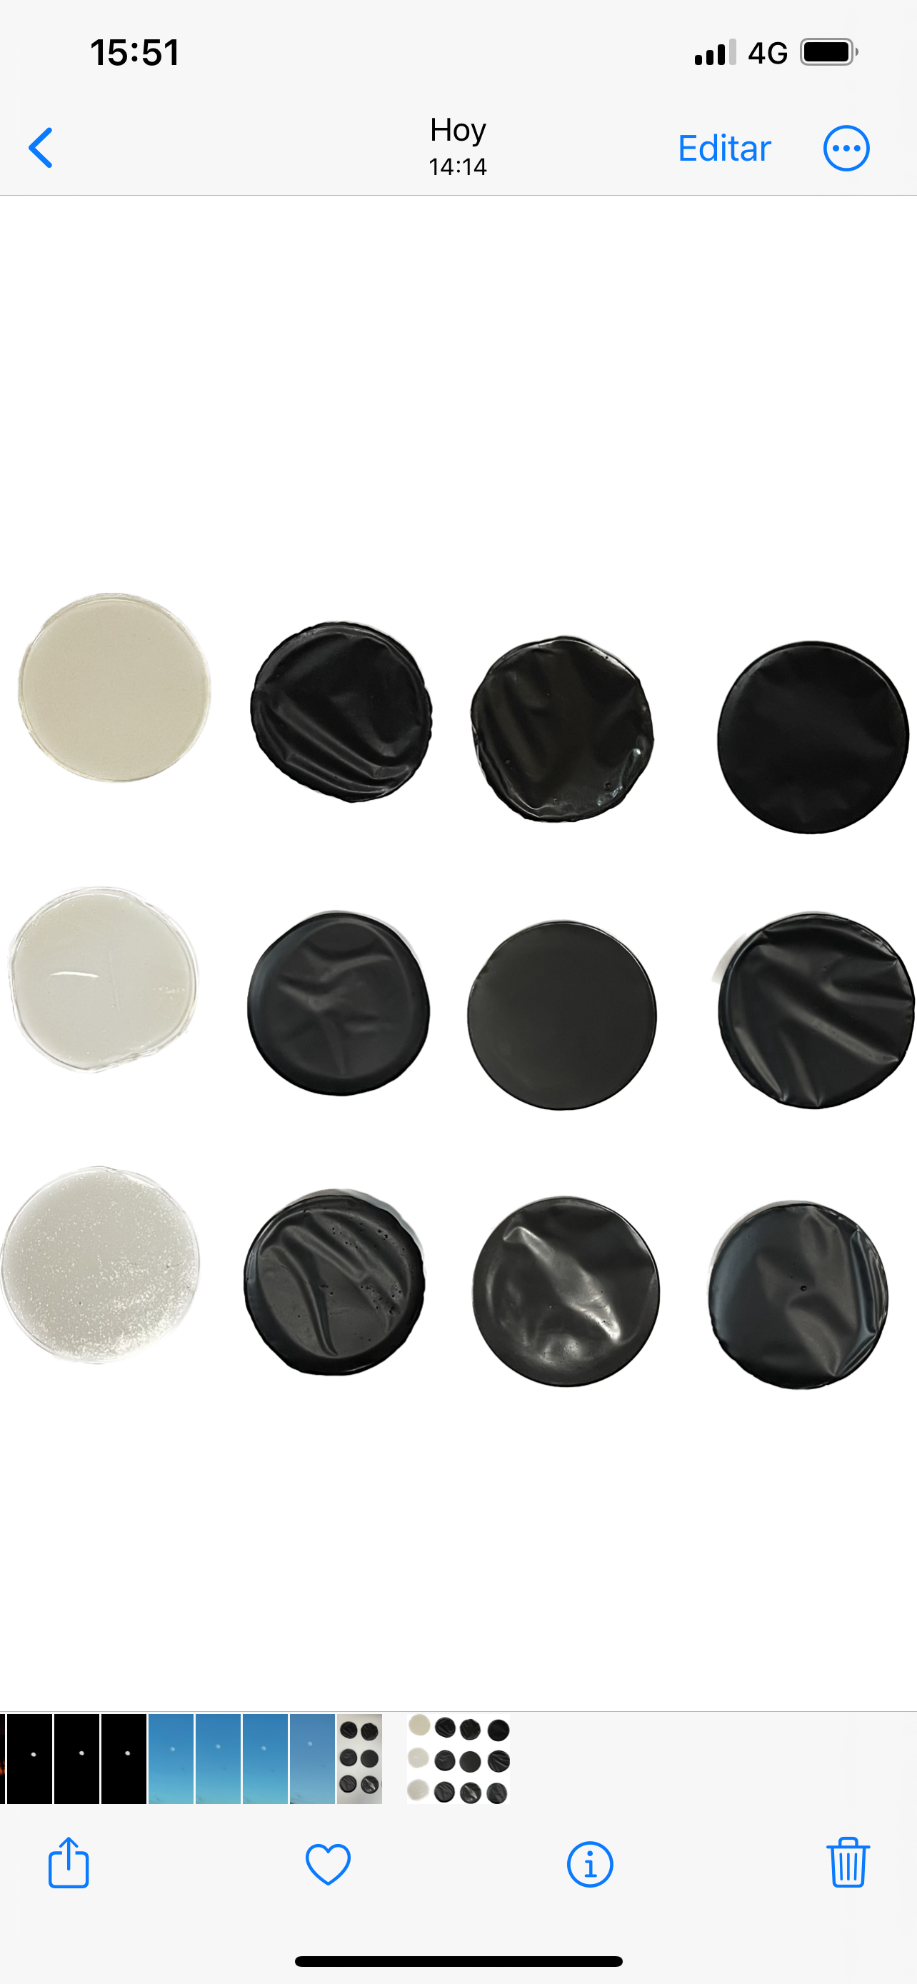 | 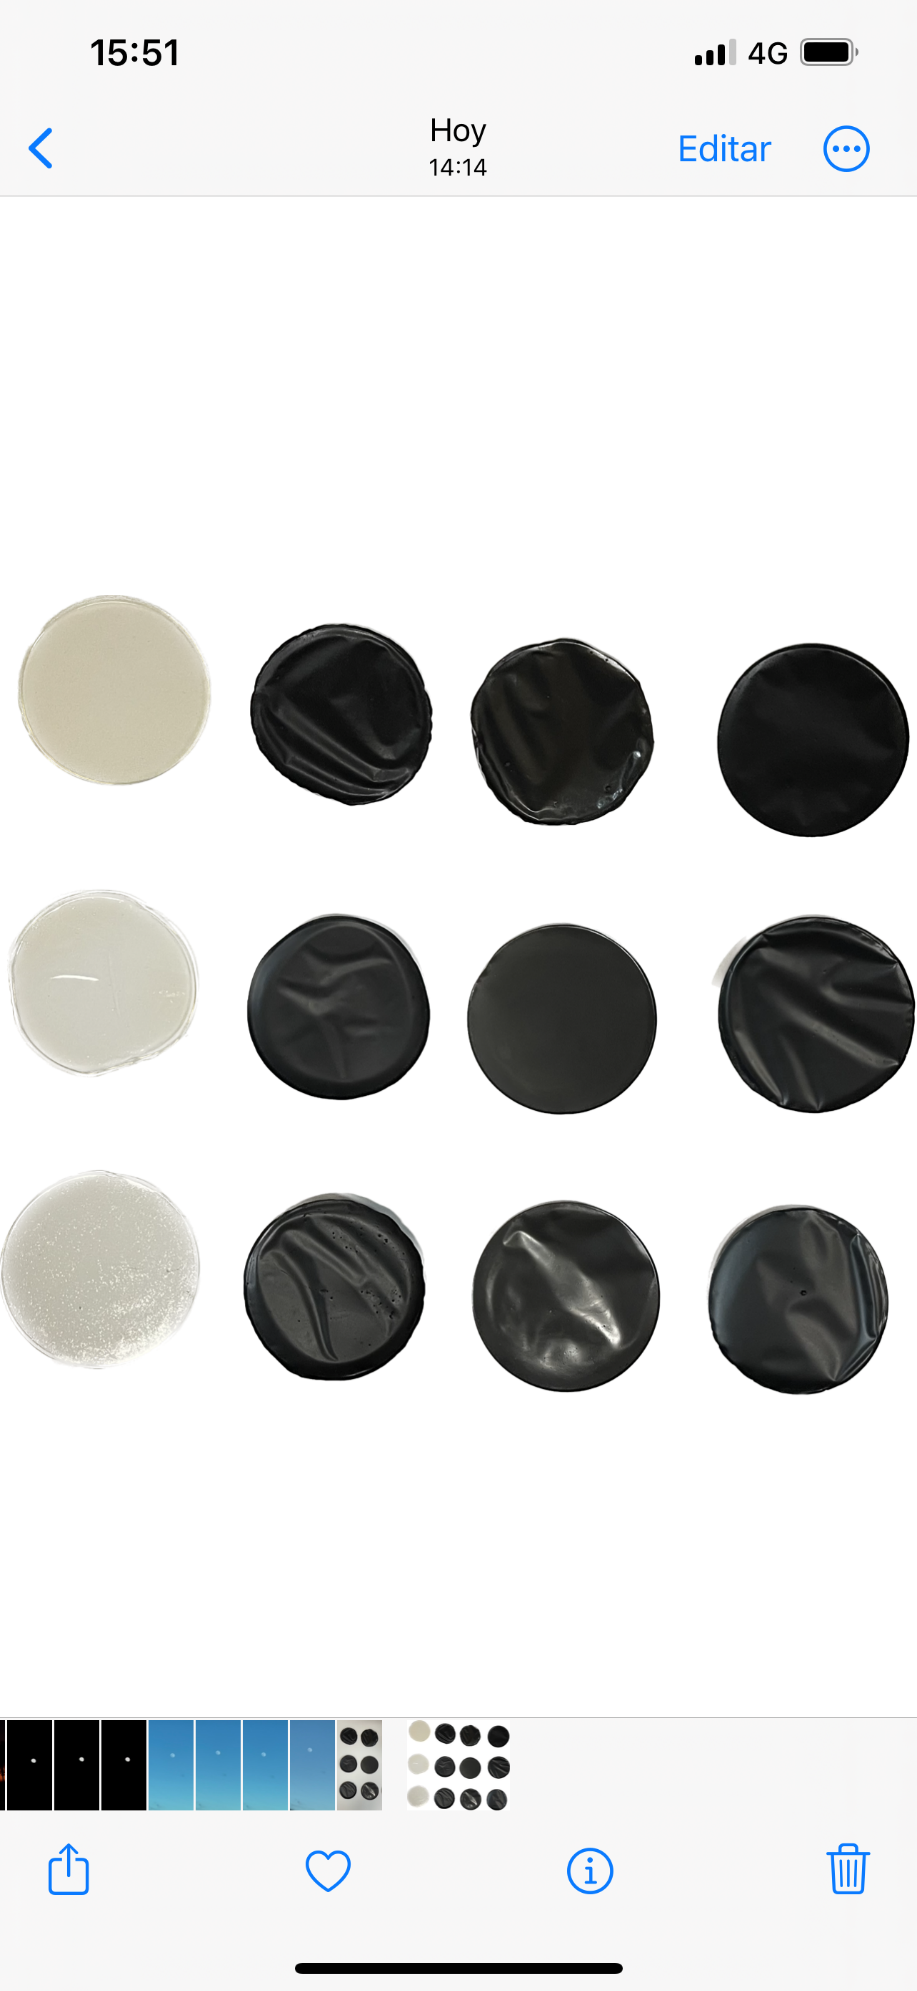 | 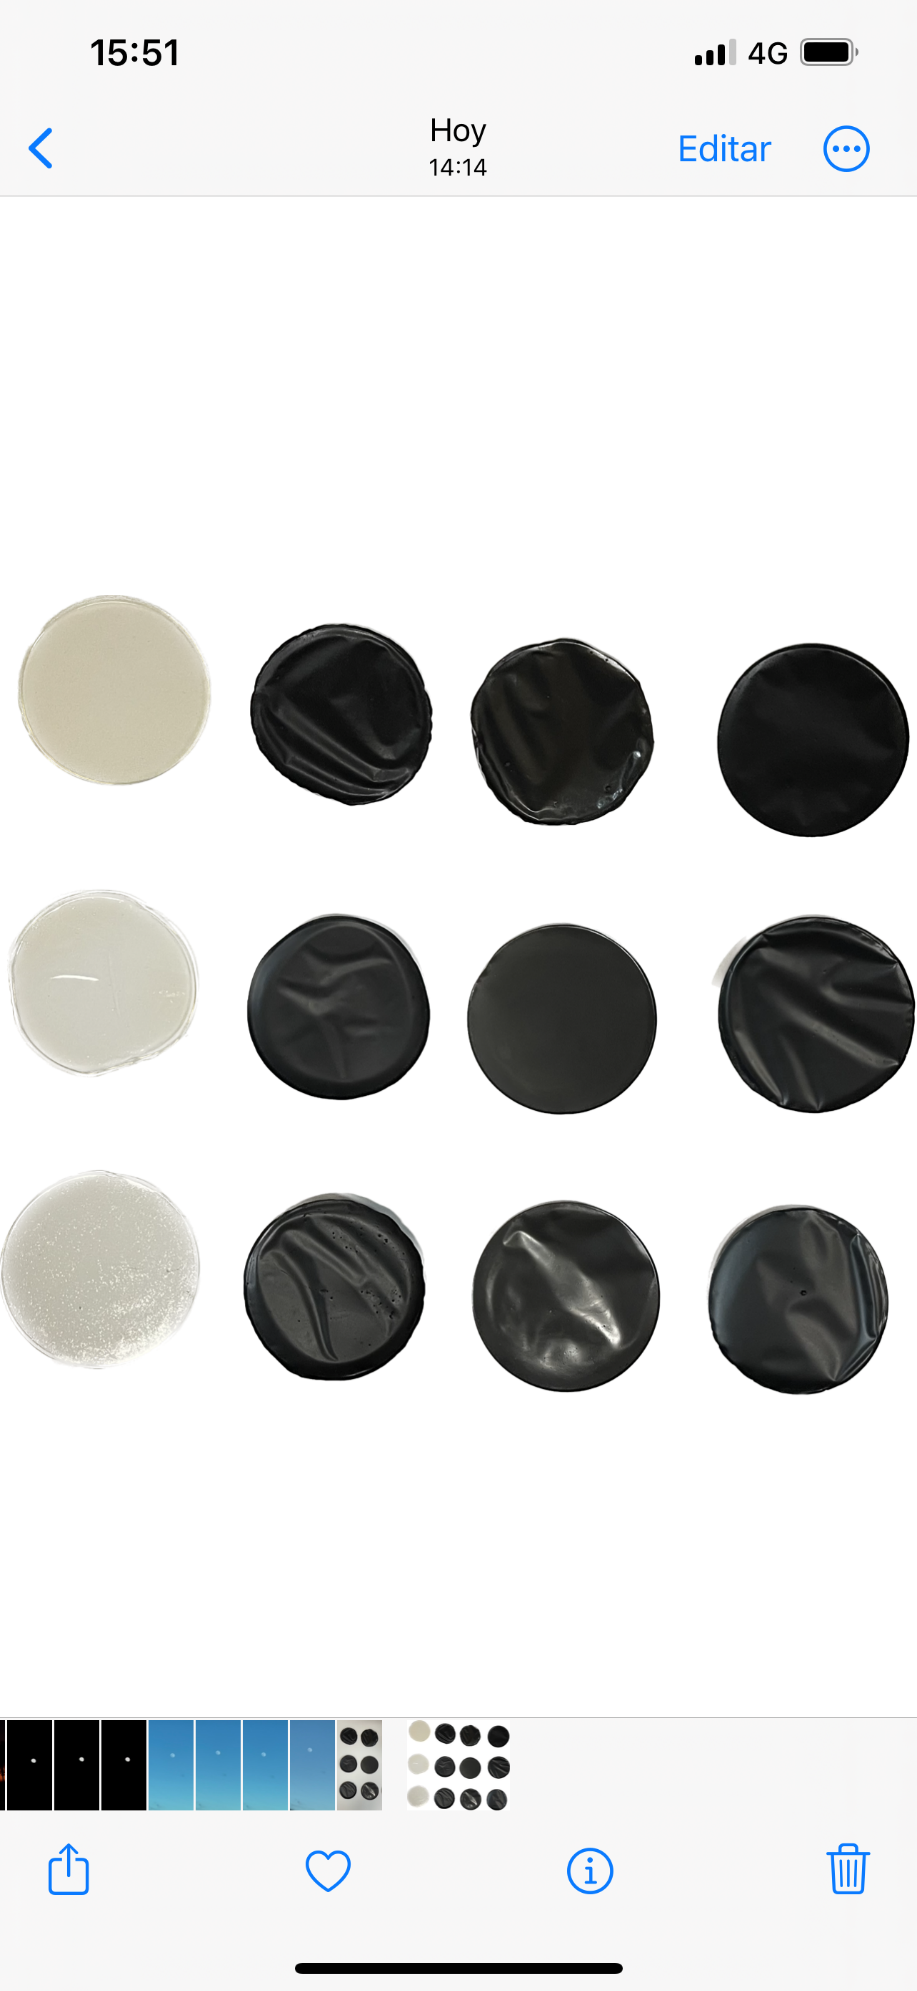 |
| CSM | 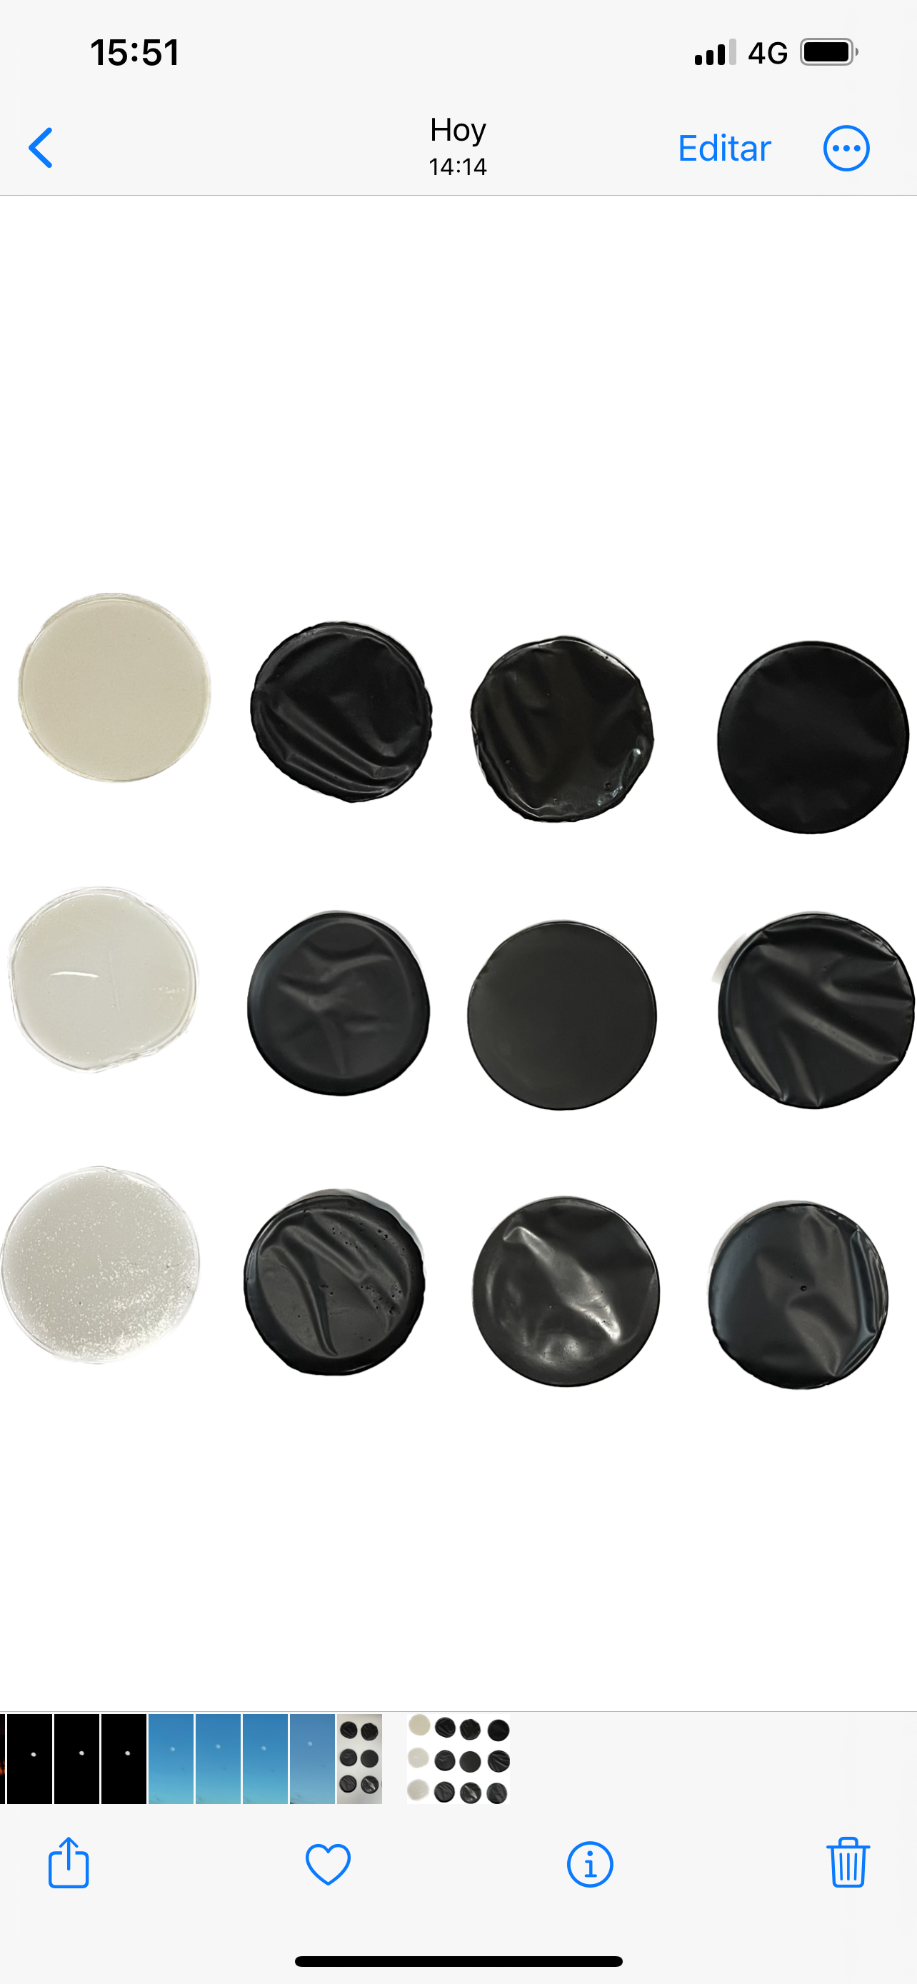 | 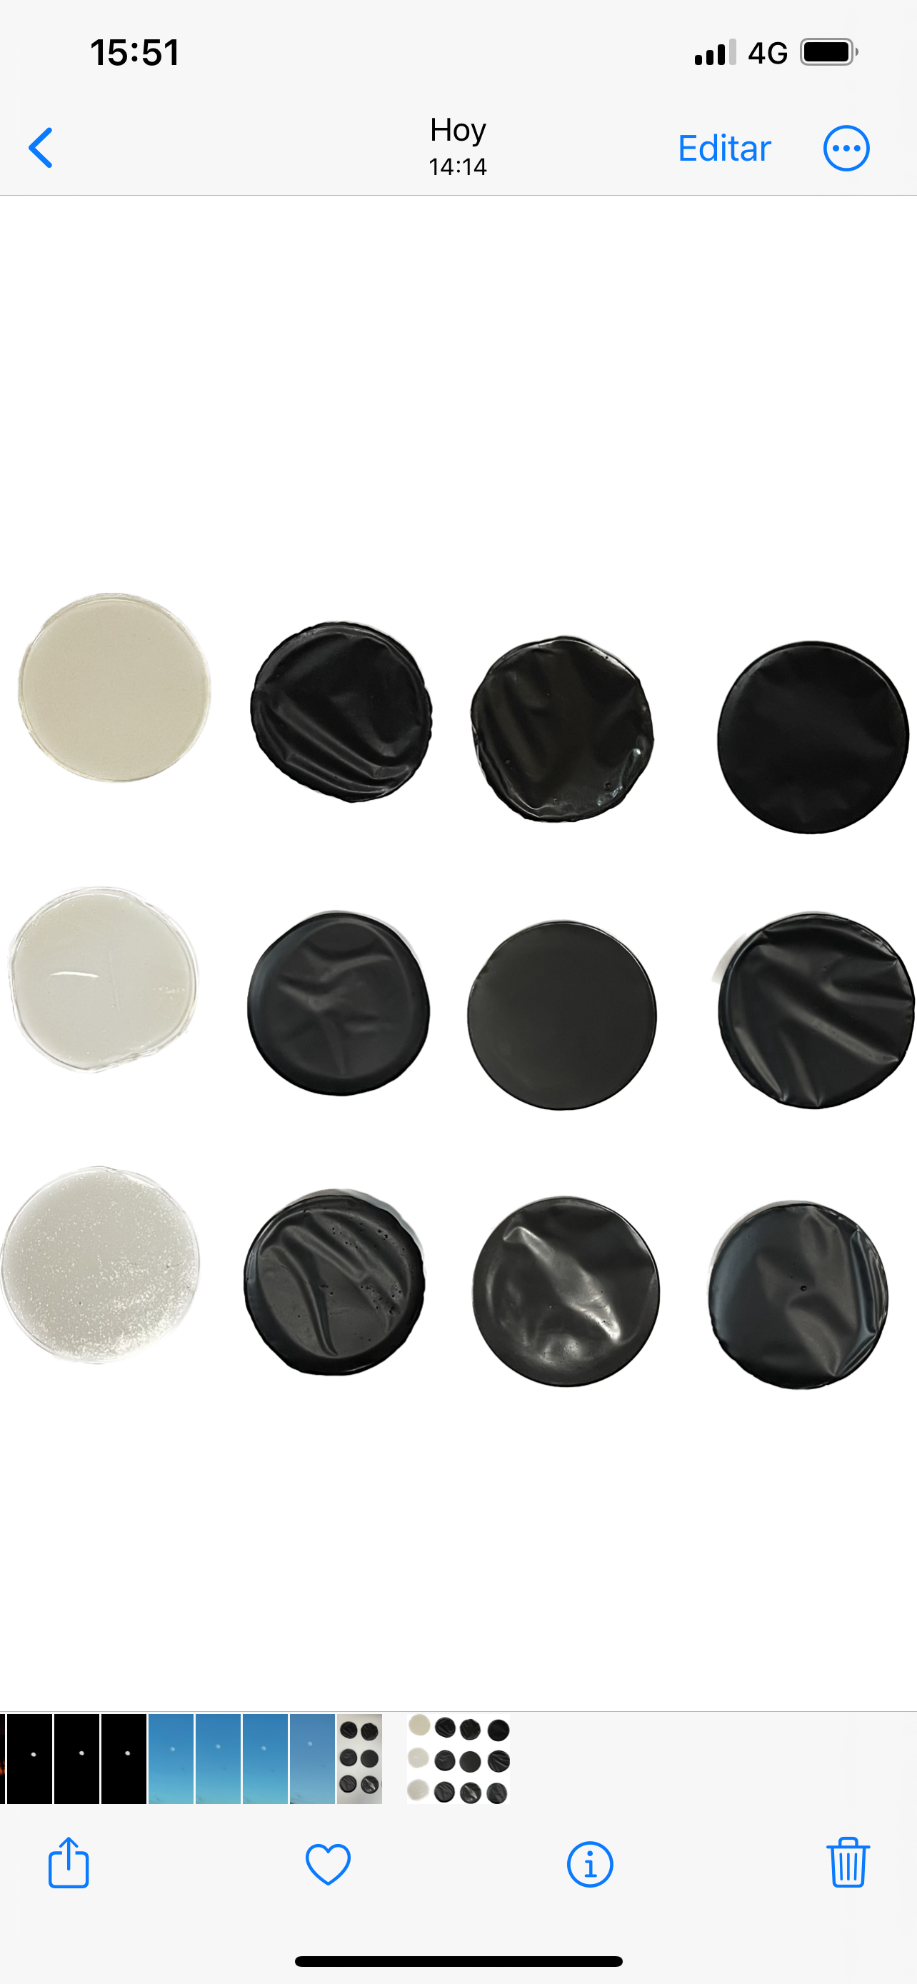 | 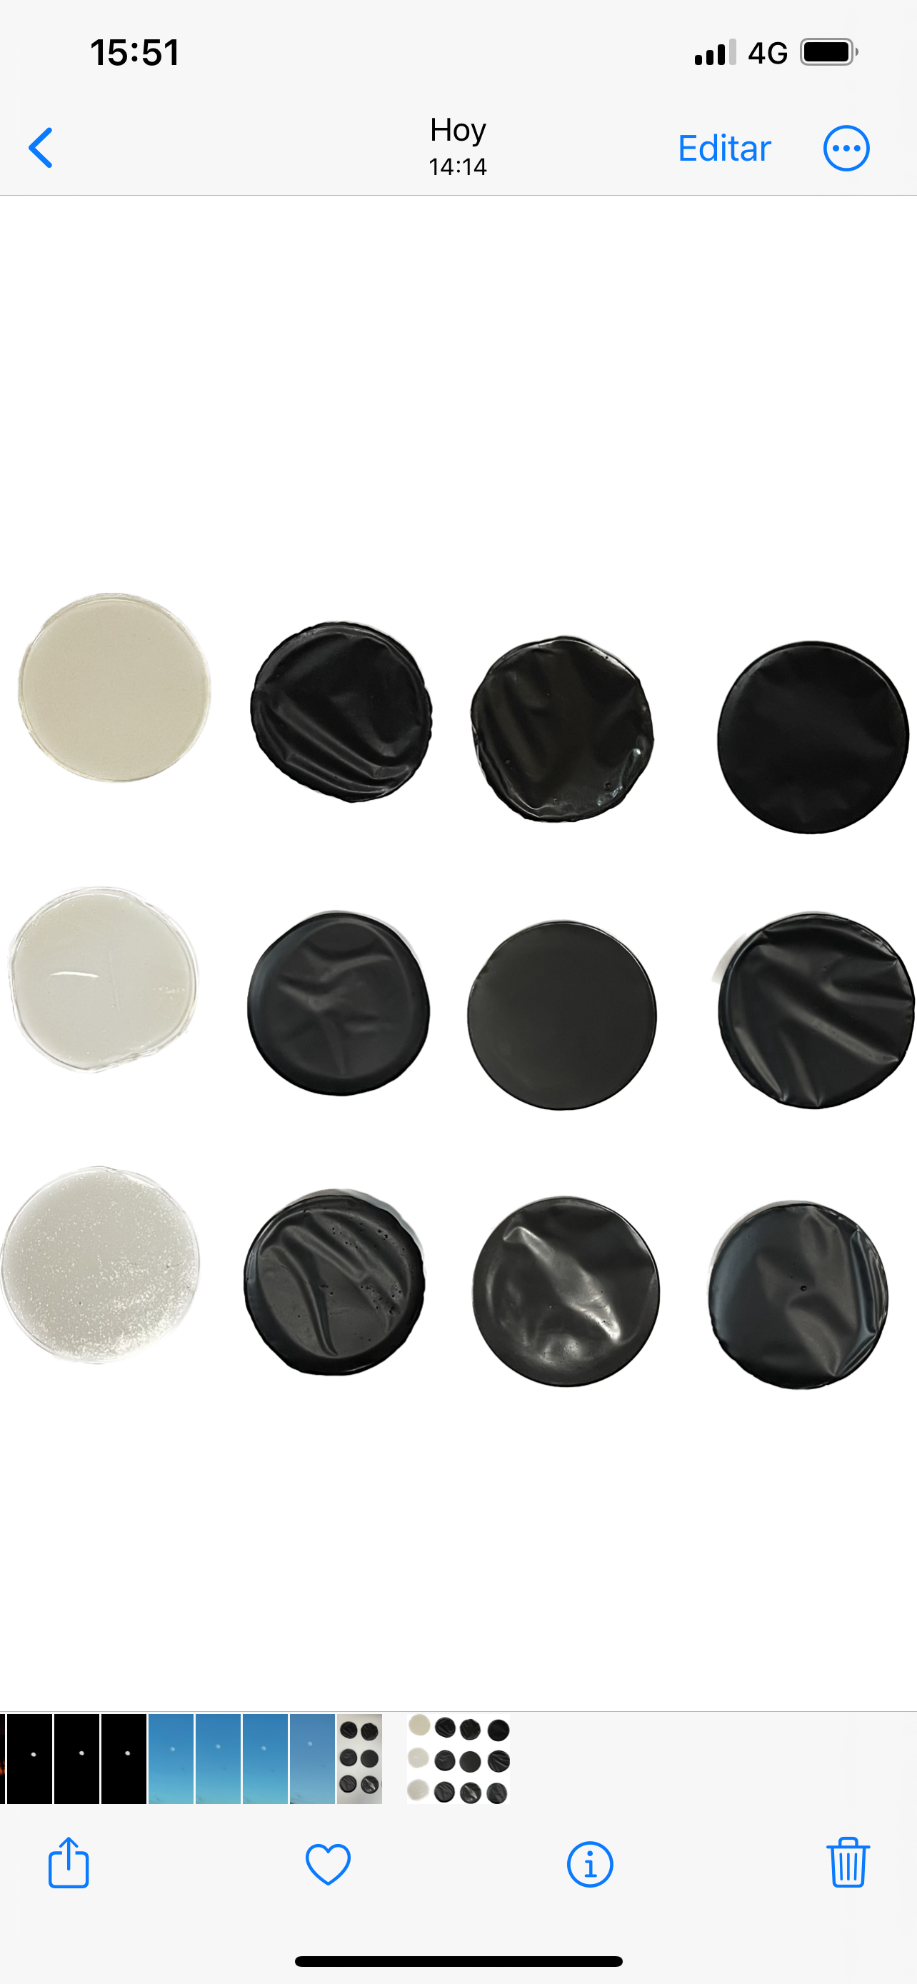 | 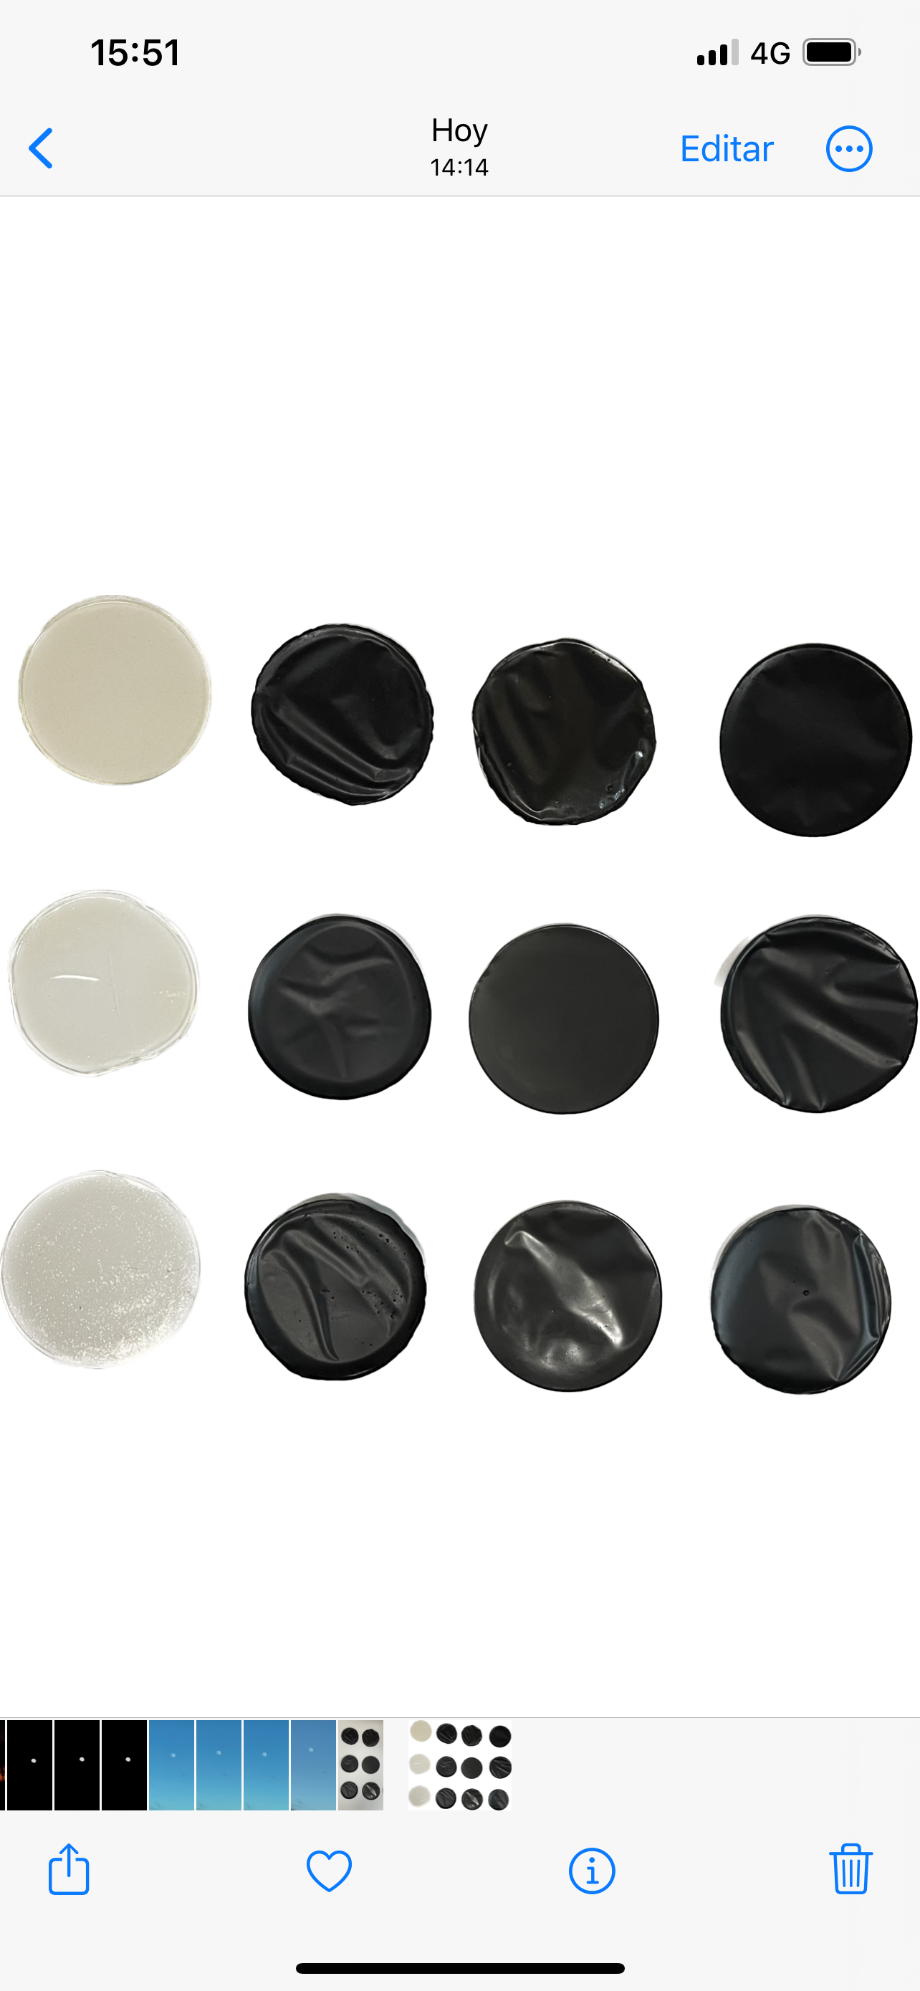 |
| CSH | 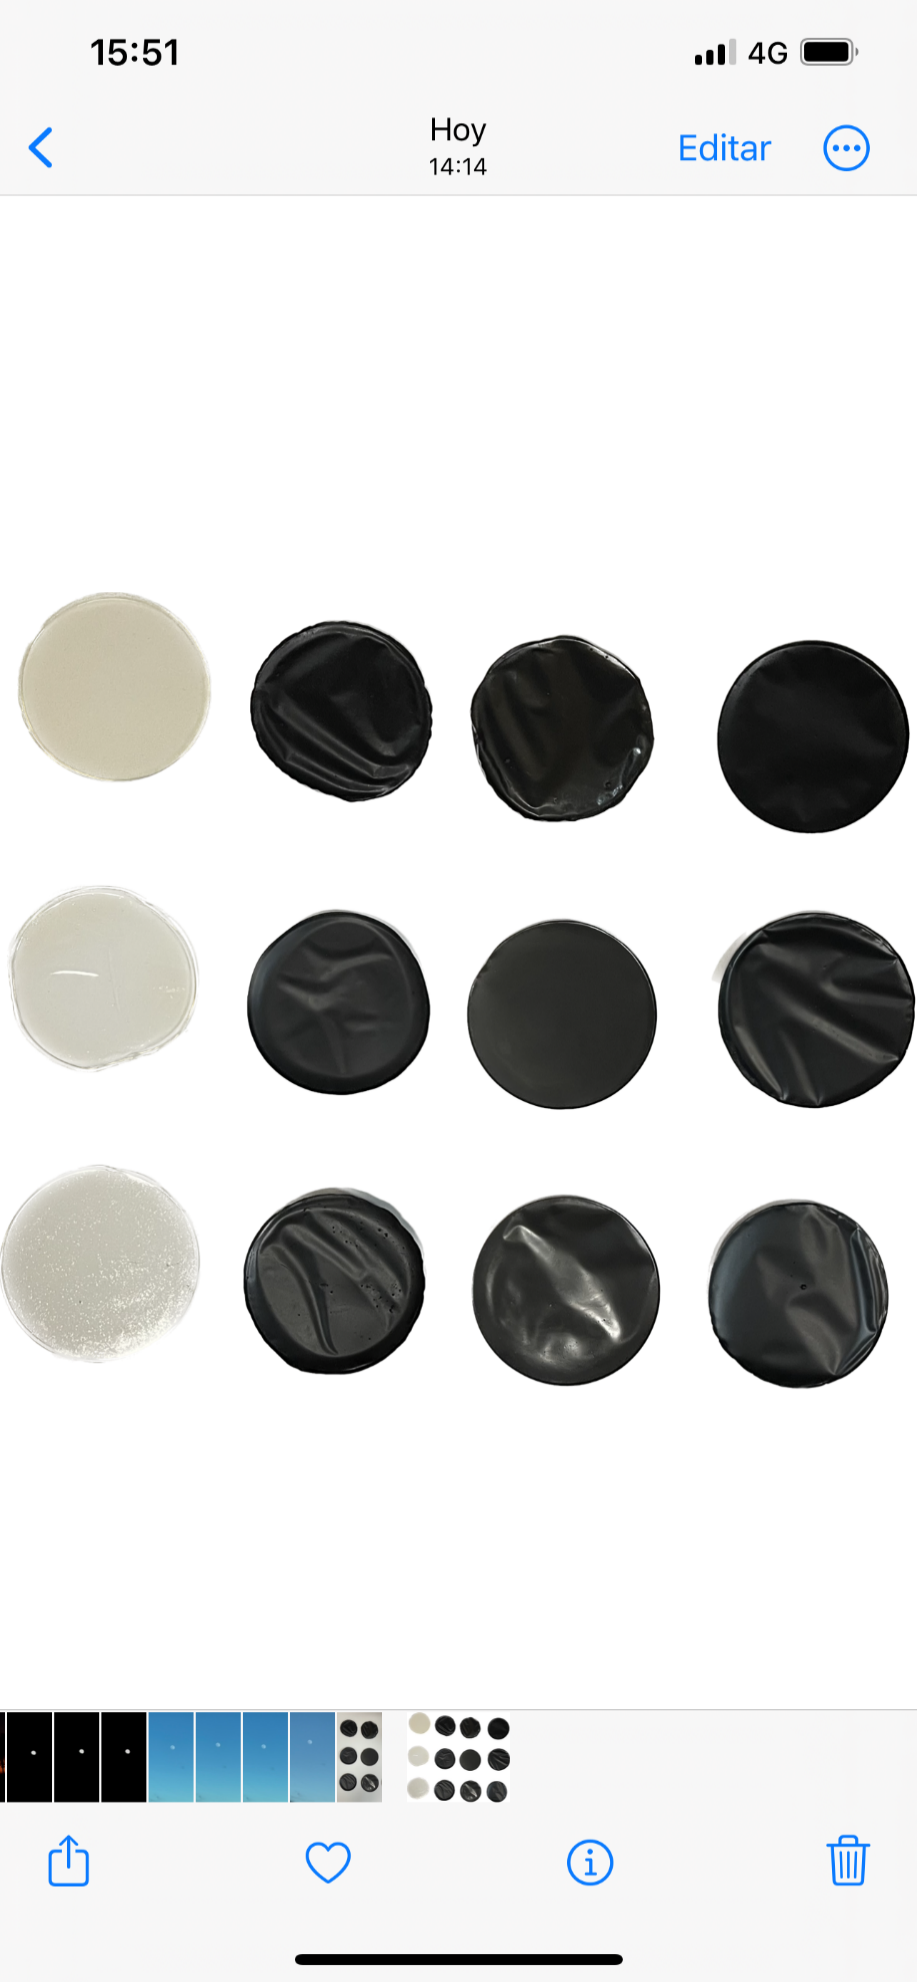 | 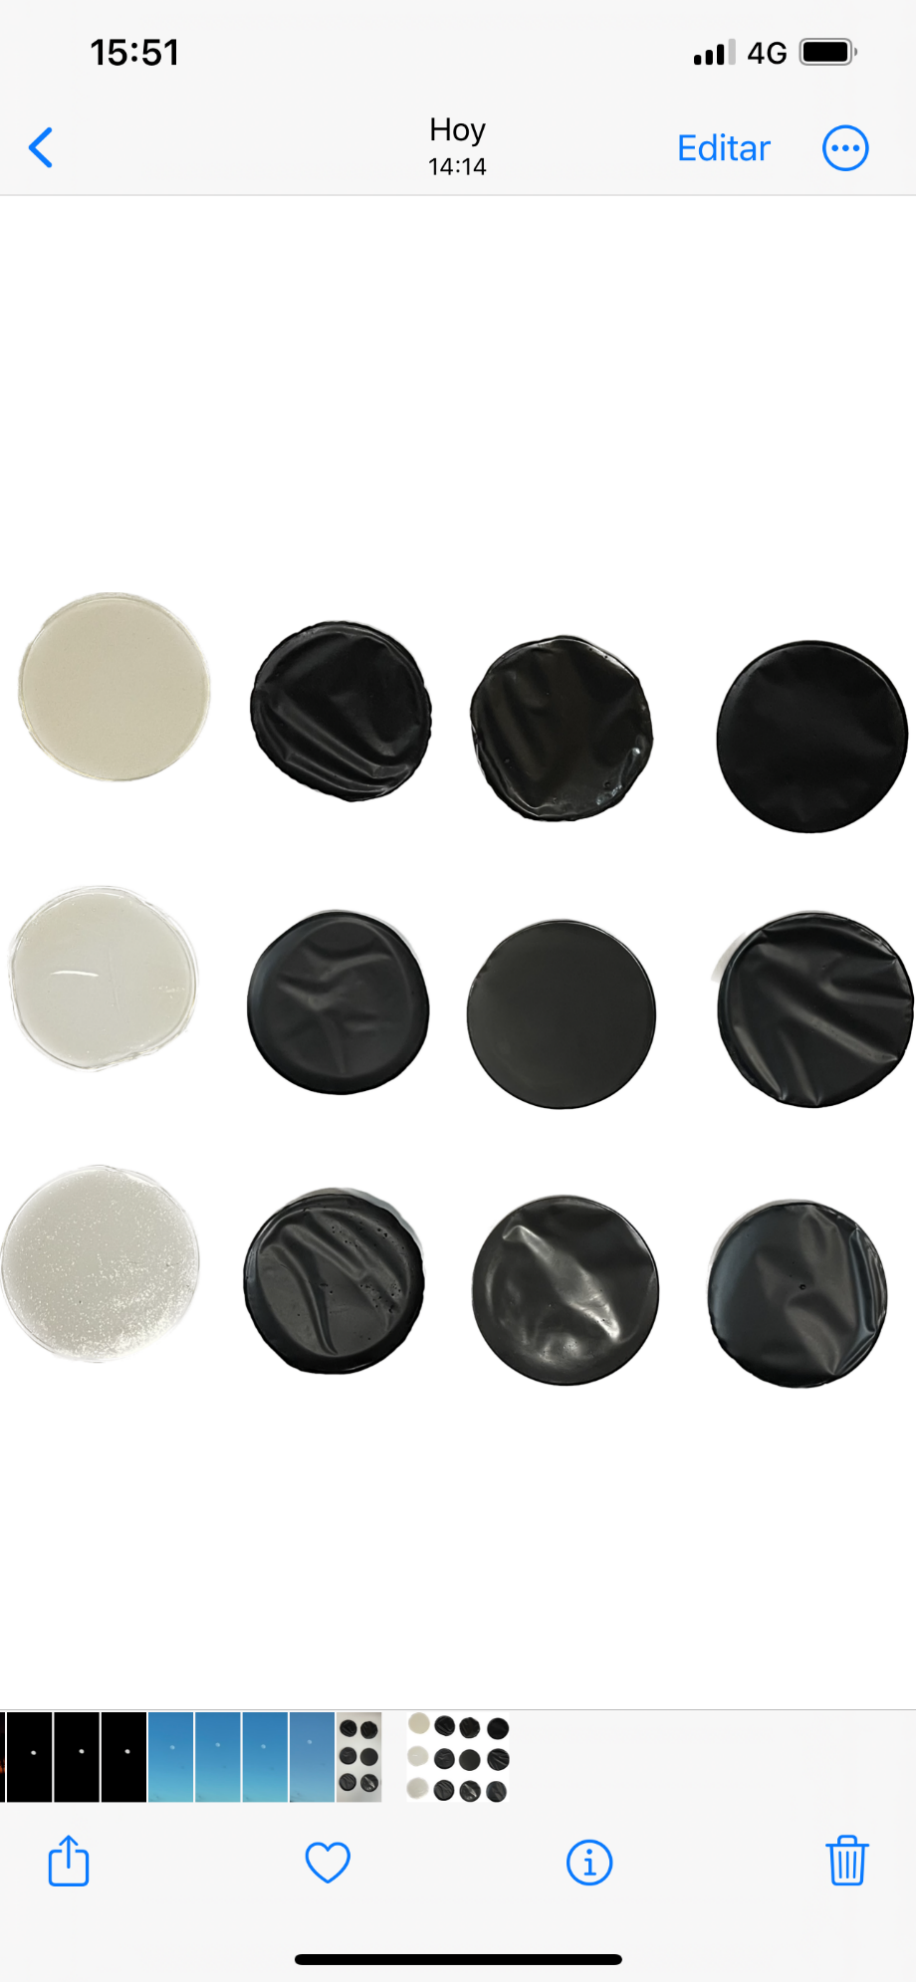 | 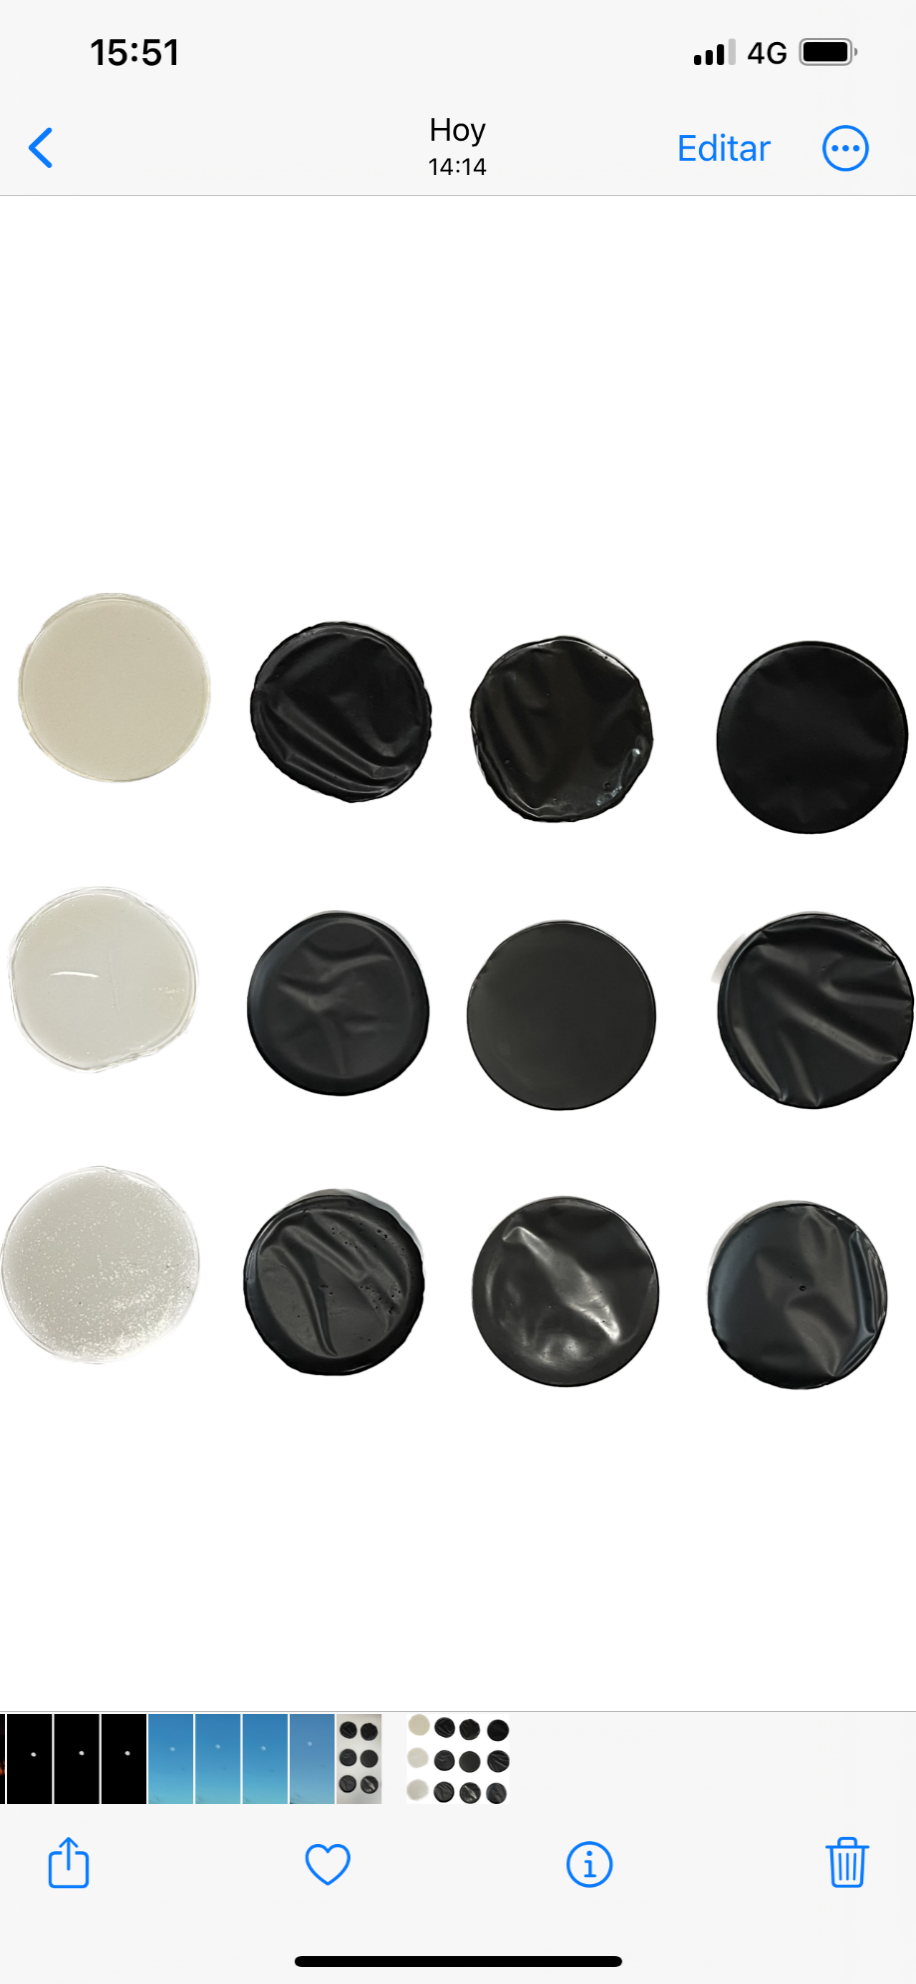 | 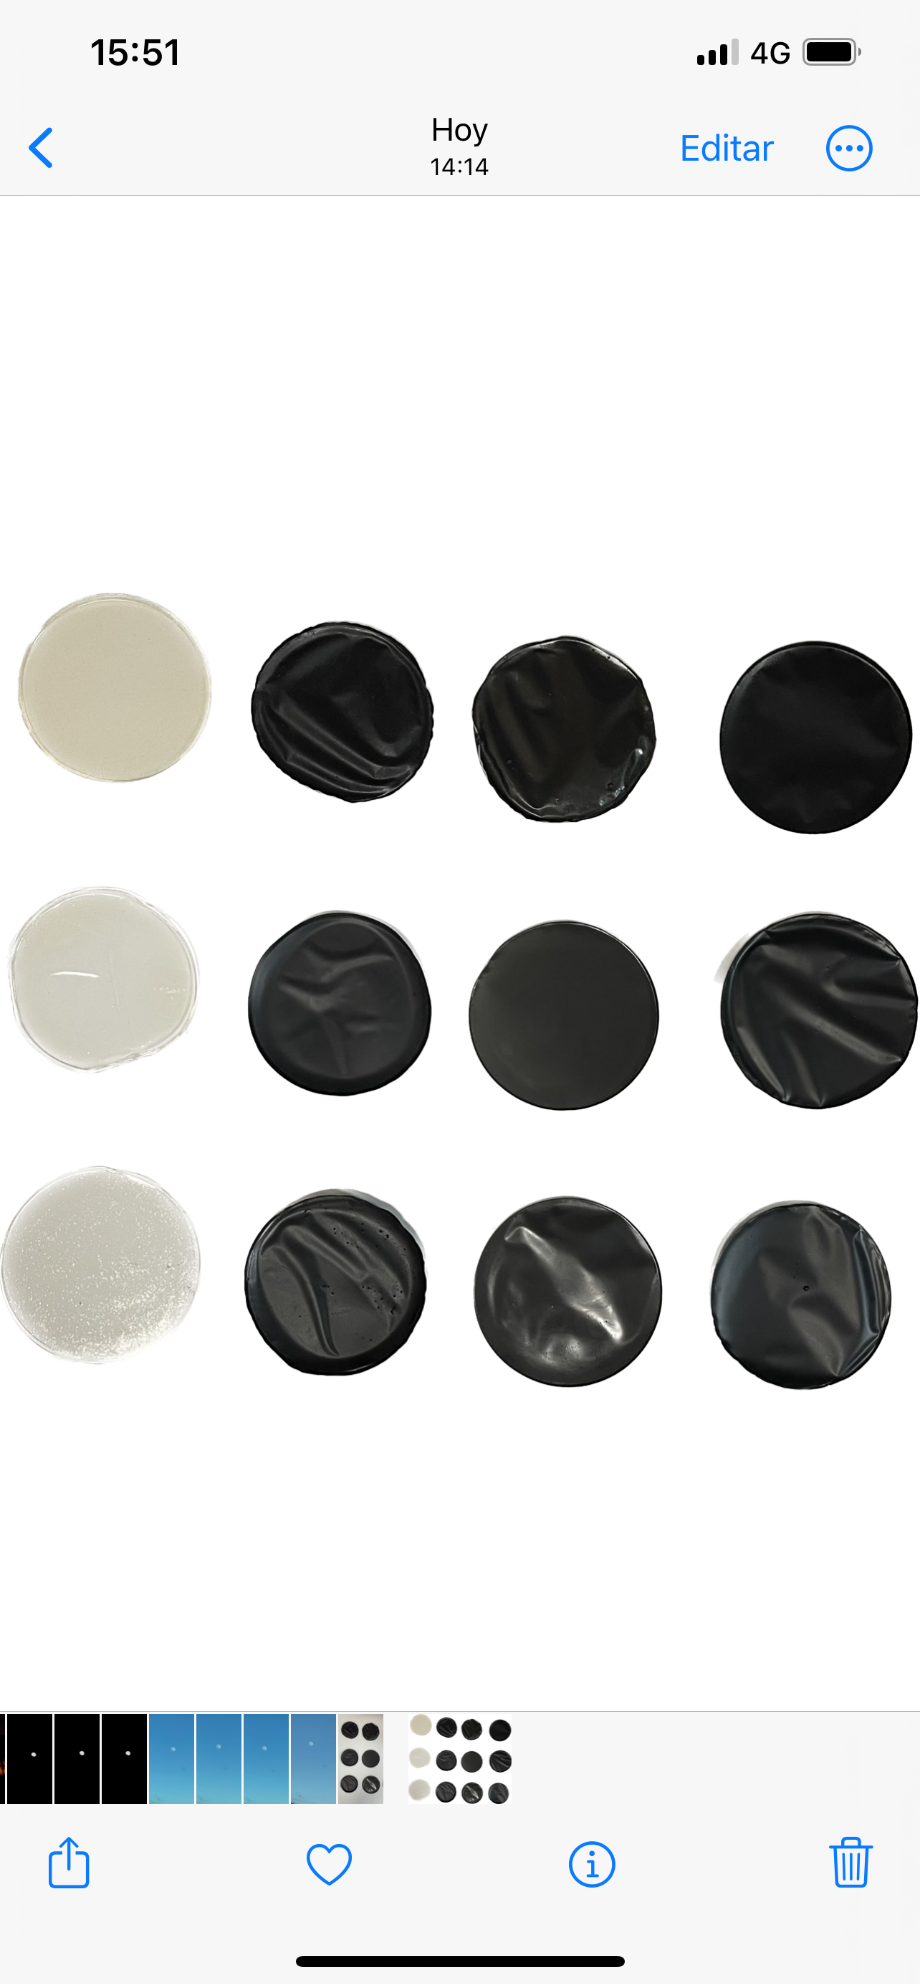 |
| Fig. S1 Photographs of the as-prepared chitosan films and their composites. | | | | |

|  |  |
| --- | --- |
| Fig. S2 (a) FTIR spectra of graphene oxide (red line) and rGO (black line) and (b) Raman spectra of the rGO with the inner components that indicate a reduction of the oxygen-containing groups. | |

|  |  |
| --- | --- |
| Fig. S3 Enlarged comparison of the (002) plane of (a) CNT-chitosan films and (b) rGO-chitosan films. | |

|  |
| --- |
| Fig. S4 XPS survey spectrum and high resolution of CSM, cCSM, eCSM, and mCSM films. |

|  |
| --- |
|  |
|  |
| Fig. S5 Strain-stress curves extracted from the mechanical test of (a) LCS, (b) MCS, and (c) HCS and its composites. |
|  |


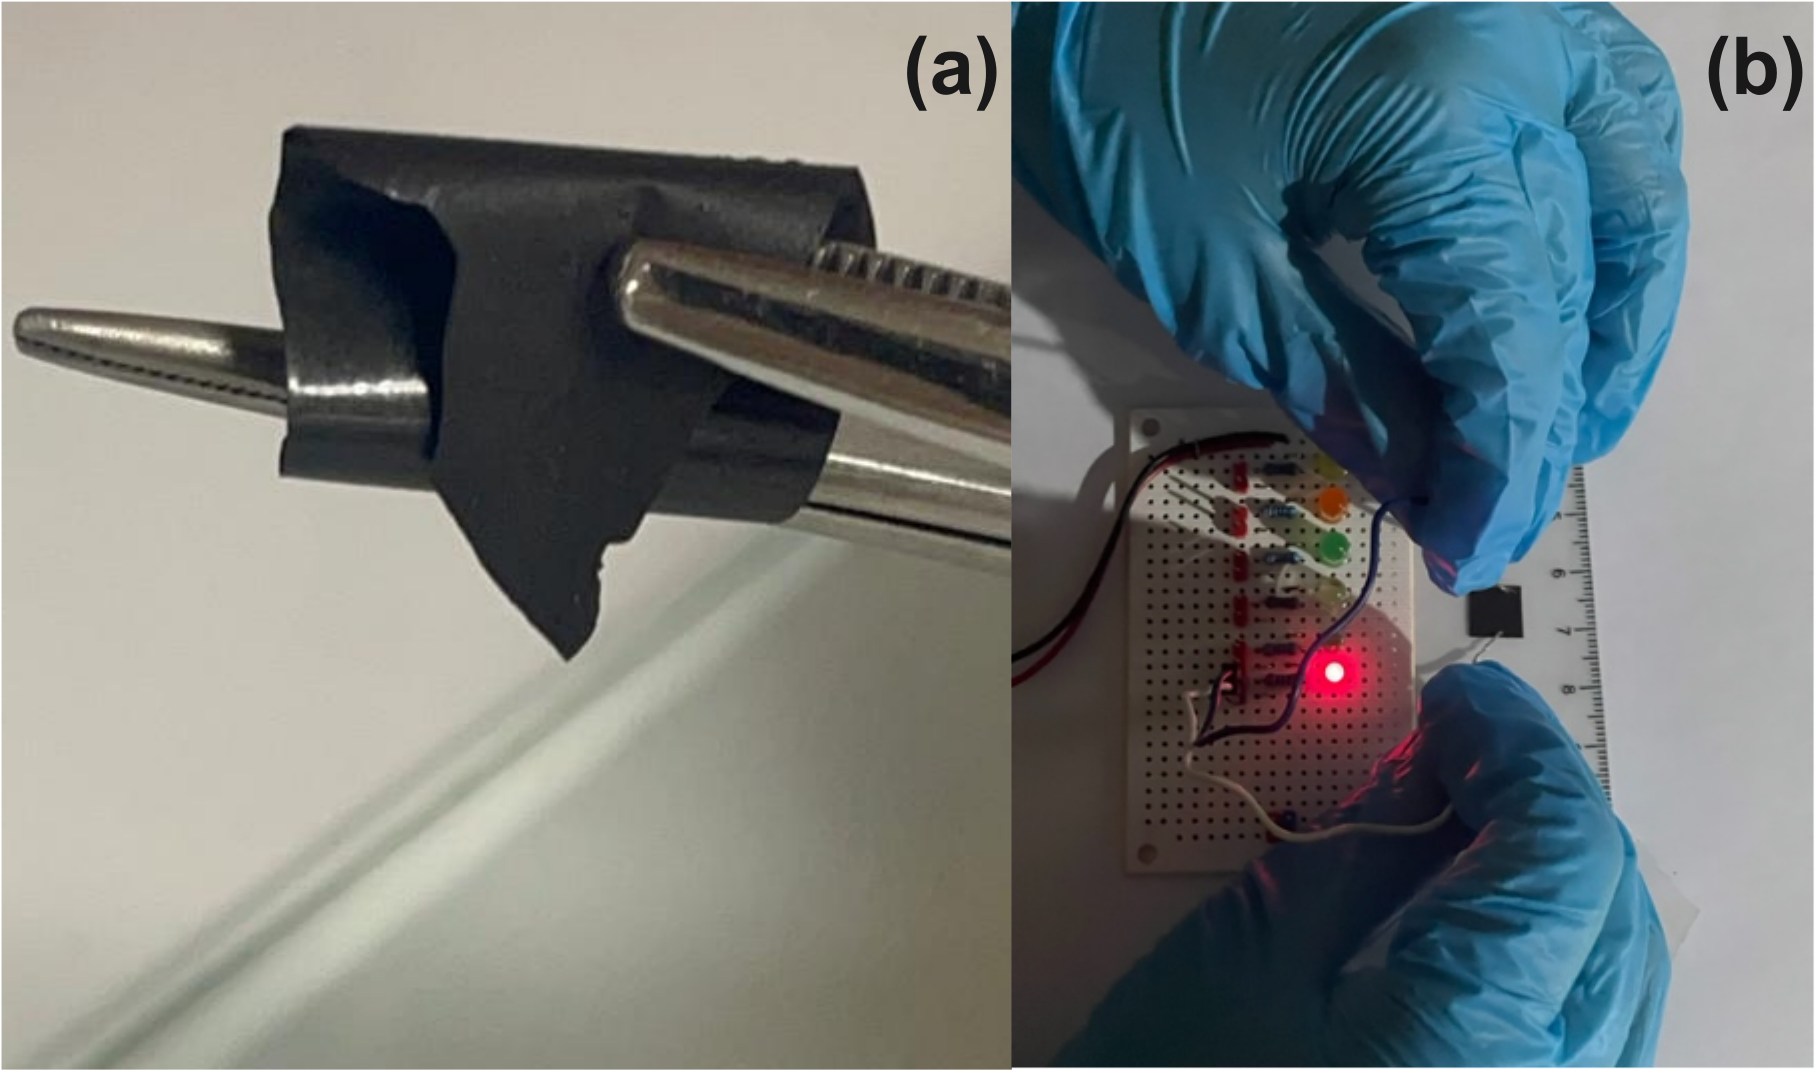


| Fig. S6 Flexible (a) and electrically conductive (b) composite film fabricated with low-molecular-weight chitosan and carbon nanotubes via cast-solvent technique. |
| --- |

- 1. **Tables**

Table S1 Labels of the formulations.

| **Sample** | **Label** |
| --- | --- |
| Chitosan low-molecular weight | CSL |
| Chitosan medium-molecular weight | CSM |
| Chitosan high-molecular weight | CSH |
| Chitosan low-molecular weight/MWCNT | *c*CSL |
| Chitosan medium-molecular weight/MWCNT | *c*CSM |
| Chitosan high-molecular weight/MWCNT | *c*CSH |
| Chitosan low-molecular weight/rGO | *e*CSL |
| Chitosan medium-molecular weight/rGO | *e*CSM |
| Chitosan high-molecular weight/rGO | *e*CSH |
| Chitosan low-molecular weight/MWCNT/rGO | *m*CSL |
| Chitosan medium-molecular weight/MWCNT/rGO | *m*CSM |
| Chitosan high-molecular weight/MWCNT/rGO | *m*CSH |
