# Supplementary material for: Improved mechanical, optical, and electrical properties of chitosan films with the synergistic reinforcing effect of carbon nanotubes and reduced graphene oxide for potential optoelectronic applications
Source: Research Square preprint supplement (doi:10.21203/rs.3.rs-2725043/v1), 2023-04-03
Supplement: Supplementary file 2 [file 1eb681aa4485b4ece2252893.doc]

**Supporting Information**

**Improved mechanical, optical, and electrical properties of chitosan films with the synergistic reinforcing effect of carbon nanotubes and reduced graphene oxide for potential optoelectronic applications**

Jesús Roldán González-Martínez1, Aurora Guadalupe Magallanes-Vallejo2, Ana Bertha López-Oyama 3,4*, Tomás Jesús Madera-Santana5, Karely Anaya-Garza3*, Eugenio Rodríguez-González2, Felipe Barfusson-Domínguez6, Rogelio Gámez-Corrales6

*1DIFUS. Universidad de Sonora, Rosales y Transversal 83000 Hermosillo, Sonora, México*

*2 Cicata-IPN. Km 14.5 Carr. Puerto Industrial. 89600. Altamira, Tamaulipas, México*

*3DIQM. Universidad de Sonora, Rosales y Transversal 83000 Hermosillo, Sonora, México*

*4 Conacyt-Cicata Km. 14.5 Carretera Puerto Industrial. 89600. Altamira, Tamaulipas, México*

*5CIAD, A.C., Carr. Gustavo E. Astiazarán Rosas No. 46, Col. La Victoria, C.P. 83304, Hermosillo, Sonora, México.*

*6Departamento de Física, Universidad de Sonora, Rosales y Transversal, 83000 Hermosillo, Sonora, México*

*Corresponding author: [ablopezoy@conacyt.mx](mailto:ablopezoy@conacyt.mx) (López-Oyama, Ana Bertha) and [karely.anaya@unison.mx](mailto:karely.anaya@unison.mx) (Anaya-Garza, Karely)

|  |
| --- |
|  |
|  |
|  |
|  |

The graphic program to create artwork were Wondershare Edraw Max and Inkscape

All the graphics were plotted with OriginLab

The scanning electron microscope images were analyzed with Digital Surf Software Free Trial License (DS-2BDD684CC063245)
